# Supplementary material for: Comparative Genomics of Listeria monocytogenes Isolates from Ruminant Listeriosis Cases in the Midwest United States
Source: PubMed Central journal article supplement (PMC9769944; doi:10.1128/spectrum.01579-22), 2022-10-31
Supplement: spectrum.01579-22-s0001.pdf [file spectrum.01579-22-s0001.pdf]

**Supplemental Table 2. Phages in *L. monocytogenes* isolates used in this study.**

| ID     | Lineage | SL   | Clinical manifestation | Prophage                                    |
|--------|---------|------|------------------------|---------------------------------------------|
| TB0405 | 1       | 191  | Neurologic             | A006 [NC_009815]; LP-030-3 [NC_024384]      |
| TB0693 | 1       | 191  | Fetal infection        | A006 [NC_009815]                            |
| TB0695 | 1       | 191  | Neurologic             | A118 [NC_003216]                            |
| TB0358 | 2       | 7    | Neurologic             | A118 [NC_003216]                            |
| TB0360 | 2       | 7    | Neurologic             | A118 [NC_003216]                            |
| TB0452 | 2       | 7    | Other                  | A118 [NC_003216]                            |
| TB0451 | 2       | 7    | Neurologic             | LP-101 [NC_024387]; A118 [NC_003216]        |
| TB0363 | 2       | 21   | Neurologic             | LP-101 [NC_024387]                          |
| TB0632 | 2       | 37   | Fetal infection        | LP-101 [NC_024387]                          |
| TB0353 | 2       | 91   | Fetal infection        | LP-101 [NC_024387]                          |
| TB0527 | 2       | 92   | Fetal infection        | LP-101 [NC_024387]; vB LmoS 188 [NC_028871] |
| TB0511 | 2       | 121  | Fetal infection        | vB LmoS 293 [NC_028929]                     |
| TB0694 | 2       | 659  | Other                  | LP-101 [NC_024387]; A006 [NC_009815]        |
| TB0678 | 2       | 689  | Other                  | LP-030-3 [NC_024384]                        |
| TB0700 | 3       | 2795 | Neurologic             | 2389 [NC_003291]                            |
